# Supplementary material
Source: PubMed Central journal article supplement (PMC6601107)
Supplement: 2019_220152-Disclosure.pdf [file 2019_220152-Disclosure.pdf]

Haematologica  
HAEMATOL/2019/220152  
Version 1

Clonal evolution in myeloma: a narrow road to remission

Cornelius C Miething

Disclosures: Nothing to disclose.
